# Supplementary material for: NHM-SMAP: Spatially and temporally high resolution non-hydrostatic atmospheric model coupled with detailed snow process model for Greenland Ice Sheet
Source: Copernicus journal article supplement (doi:10.5194/tc-2017-115), 2017-06-29
Supplement: Supplementary file [file tc-2017-115-AC6-supplement.pdf]

**Table S1. Model performance in terms of simulating hourly 2 m water vapor pressure (in hPa) at each AWS on the GrIS (Figure 1). Note that the evaluation were conducted at only SIGMA and PROMICE sites. ME, RMSE, and R<sup>2</sup> are the mean error (the average of the difference between simulated values and observed values), and the coefficient of determination, respectively. Number of observations (OBS) employed for the comparison are also listed.**

| Sites             | ME (hPa)     | RMSE (hPa)  | R <sup>2</sup> | Number of observations |
|-------------------|--------------|-------------|----------------|------------------------|
| SIGMA-A           | 0.07         | 0.36        | 0.95           | 18998                  |
| SIGMA-B           | 0.21         | 0.48        | 0.94           | 18541                  |
| KPC_U             | -0.01        | 0.44        | 0.95           | 26139                  |
| SCO_U             | -0.16        | 0.62        | 0.90           | 25786                  |
| TAS_U             | -0.33        | 0.76        | 0.84           | 23263                  |
| QAS_L             | -0.53        | 0.88        | 0.89           | 23483                  |
| QAS_A             | -0.42        | 0.77        | 0.89           | 8678                   |
| NUK_L             | -0.23        | 0.67        | 0.92           | 21933                  |
| NUK_U             | -0.30        | 0.63        | 0.92           | 20908                  |
| NUK_N             | -0.23        | 0.56        | 0.93           | 19955                  |
| KAN_L             | -0.02        | 0.52        | 0.94           | 25518                  |
| KAN_M             | -0.15        | 0.59        | 0.92           | 20379                  |
| KAN_U             | -0.05        | 0.46        | 0.93           | 22925                  |
| UPE_L             | -0.27        | 0.69        | 0.92           | 25409                  |
| UPE_U             | -0.27        | 0.56        | 0.95           | 23036                  |
| <b>Mean value</b> | <b>-0.18</b> | <b>0.60</b> | <b>0.92</b>    |                        |

**Table S2. Model performance in terms of simulating hourly surface pressure (in hPa) at each AWS on the GrIS (Figure 1). Elevation differences between the reality and NHM-SMAP are indicated together.**

| Sites             | ME (hPa)    | RMSE (hPa) | R <sup>2</sup> | Number of observations | Elevation difference (m) |
|-------------------|-------------|------------|----------------|------------------------|--------------------------|
| SIGMA-A           | -2.8        | 2.9        | 0.99           | 18998                  | 4                        |
| SIGMA-B           | 17.4        | 17.4       | 0.99           | 18550                  | -165                     |
| Summit            | -7.6        | 8.9        | 0.86           | 13064                  | 44                       |
| S-Dome            | -4.3        | 4.4        | 1.00           | 11161                  | 20                       |
| KPC_U             | -5.5        | 5.6        | 0.99           | 26304                  | 23                       |
| SCO_U             | -23.1       | 23.2       | 0.98           | 26249                  | 176                      |
| TAS_U             | -2.3        | 2.6        | 0.99           | 23330                  | 1                        |
| QAS_L             | -12.5       | 12.6       | 0.99           | 26302                  | 85                       |
| QAS_A             | -13.9       | 13.9       | 1.00           | 9267                   | 104                      |
| NUK_L             | -7.5        | 7.6        | 0.99           | 26296                  | 26                       |
| NUK_U             | -13.0       | 13.1       | 0.98           | 20933                  | 85                       |
| NUK_N             | -8.4        | 8.5        | 0.99           | 23570                  | 46                       |
| KAN_L             | 5.6         | 5.7        | 0.99           | 26303                  | -74                      |
| KAN_M             | -7.8        | 8.0        | 0.98           | 21208                  | 49                       |
| KAN_U             | -3.7        | 3.7        | 0.99           | 24084                  | 20                       |
| UPE_L             | -7.2        | 7.3        | 0.98           | 25743                  | 34                       |
| UPE_U             | -8.6        | 8.7        | 0.99           | 26300                  | 77                       |
| <b>Mean value</b> | <b>-8.0</b> | <b>8.9</b> | <b>0.98</b>    |                        |                          |

**Table S3. Model performance in terms of simulating hourly 10 m wind speed (in  $\text{m s}^{-1}$ ) at each AWS on the GrIS (Figure 1).**

| Sites             | ME ( $\text{m s}^{-1}$ ) | RMSE ( $\text{m s}^{-1}$ ) | R <sup>2</sup> | Number of observations |
|-------------------|--------------------------|----------------------------|----------------|------------------------|
| SIGMA-A           | -0.5                     | 2.6                        | 0.40           | 17846                  |
| SIGMA-B           | 1.0                      | 3.2                        | 0.14           | 17851                  |
| Summit            | -0.7                     | 2.5                        | 0.54           | 18825                  |
| S-Dome            | -2.0                     | 4.0                        | 0.76           | 10624                  |
| KPC_U             | 0.4                      | 1.7                        | 0.65           | 25921                  |
| SCO_U             | -0.2                     | 2.3                        | 0.13           | 25774                  |
| TAS_U             | 2.5                      | 4.3                        | 0.68           | 22977                  |
| QAS_L             | 0.2                      | 2.8                        | 0.51           | 23423                  |
| QAS_A             | -0.6                     | 2.5                        | 0.59           | 8481                   |
| NUK_L             | 0.4                      | 2.3                        | 0.52           | 21808                  |
| NUK_U             | 2.2                      | 3.2                        | 0.64           | 20807                  |
| NUK_N             | -0.3                     | 2.4                        | 0.65           | 19773                  |
| KAN_L             | 0.8                      | 2.4                        | 0.54           | 25432                  |
| KAN_M             | -0.1                     | 2.3                        | 0.72           | 21047                  |
| KAN_U             | -1.4                     | 2.8                        | 0.78           | 22660                  |
| UPE_L             | 1.3                      | 3.1                        | 0.44           | 25051                  |
| UPE_U             | 0.6                      | 2.5                        | 0.69           | 22906                  |
| <b>Mean value</b> | <b>0.2</b>               | <b>2.7</b>                 | <b>0.55</b>    |                        |

**Table S4. Model performance in terms of simulating hourly downward shortwave radiant flux (in  $W m^{-2}$ ) at each AWS on the GrIS (Figure 1).**

| Sites             | ME ( $W m^{-2}$ ) | RMSE ( $W m^{-2}$ ) | R <sup>2</sup> | Number of observations |
|-------------------|-------------------|---------------------|----------------|------------------------|
| SIGMA-A           | -13.5             | 60.2                | 0.86           | 8077                   |
| SIGMA-B           | -9.4              | 72.6                | 0.80           | 8069                   |
| Summit            | -9.1              | 75.9                | 0.88           | 10945                  |
| S-Dome            | 52.6              | 112.3               | 0.82           | 10556                  |
| KPC_U             | -28.6             | 56.0                | 0.90           | 11443                  |
| SCO_U             | 0.6               | 69.0                | 0.88           | 10972                  |
| TAS_U             | -9.6              | 88.9                | 0.81           | 8588                   |
| QAS_L             | 16.6              | 96.5                | 0.83           | 11229                  |
| QAS_A             | -3.8              | 103.7               | 0.81           | 3962                   |
| NUK_L             | 2.2               | 90.8                | 0.83           | 8384                   |
| NUK_U             | -10.5             | 82.8                | 0.87           | 8341                   |
| NUK_N             | 4.4               | 84.5                | 0.86           | 9534                   |
| KAN_L             | -17.1             | 127.3               | 0.70           | 10837                  |
| KAN_M             | -16.4             | 73.0                | 0.88           | 8510                   |
| KAN_U             | -39.4             | 81.3                | 0.91           | 10467                  |
| UPE_L             | -0.7              | 78.5                | 0.83           | 11007                  |
| UPE_U             | -7.0              | 65.0                | 0.88           | 11061                  |
| <b>Mean value</b> | <b>-5.2</b>       | <b>83.4</b>         | <b>0.84</b>    |                        |

**Table S5. Model performance in terms of simulating hourly downward longwave radiant flux (in  $W m^{-2}$ ) at each AWS on the GrIS (Figure 1). Note that the evaluation were conducted at only SIGMA and PROMICE sites.**

| Sites             | ME ( $W m^{-2}$ ) | RMSE ( $W m^{-2}$ ) | $R^2$       | Number of observations |
|-------------------|-------------------|---------------------|-------------|------------------------|
| SIGMA-A           | -24.3             | 36.6                | 0.71        | 18353                  |
| SIGMA-B           | -14.4             | 31.6                | 0.72        | 18440                  |
| KPC_U             | -14.3             | 28.3                | 0.74        | 26066                  |
| SCO_U             | -17.0             | 28.3                | 0.78        | 26221                  |
| TAS_U             | -20.5             | 32.7                | 0.66        | 23107                  |
| QAS_L             | -19.8             | 30.2                | 0.80        | 26216                  |
| QAS_A             | -21.4             | 32.5                | 0.76        | 9209                   |
| NUK_L             | -21.7             | 32.0                | 0.80        | 21835                  |
| NUK_U             | -13.6             | 28.6                | 0.78        | 20827                  |
| NUK_N             | -21.3             | 15.0                | 0.77        | 23441                  |
| KAN_L             | -13.0             | 28.1                | 0.76        | 26155                  |
| KAN_M             | -10.7             | 28.5                | 0.75        | 21140                  |
| KAN_U             | -11.7             | 29.8                | 0.71        | 23962                  |
| UPE_L             | -22.2             | 35.8                | 0.72        | 25562                  |
| UPE_U             | -13.9             | 29.8                | 0.77        | 26225                  |
| <b>Mean value</b> | <b>-17.3</b>      | <b>29.9</b>         | <b>0.75</b> |                        |

**Table S6. Model performance in terms of simulating hourly snow/firn/ice surface temperature (in °C) at each AWS on the GrIS (Figure 1). Note that the evaluation were conducted at only SIGMA and PROMICE sites.**

| Sites             | ME (°C)    | RMSE (°C)  | R <sup>2</sup> | Number of observations |
|-------------------|------------|------------|----------------|------------------------|
| SIGMA-A           | 2.3        | 4.7        | 0.91           | 19007                  |
| SIGMA-B           | 3.2        | 4.9        | 0.91           | 18551                  |
| KPC_U             | 2.6        | 4.8        | 0.93           | 26139                  |
| SCO_U             | 1.1        | 4.3        | 0.82           | 26235                  |
| TAS_U             | 1.7        | 3.2        | 0.82           | 23316                  |
| QAS_L             | 0.4        | 2.2        | 0.87           | 26301                  |
| QAS_A             | 0.0        | 2.6        | 0.90           | 9264                   |
| NUK_L             | 0.4        | 2.7        | 0.88           | 21944                  |
| NUK_U             | -0.3       | 2.7        | 0.90           | 20920                  |
| NUK_N             | 0.1        | 2.8        | 0.89           | 22793                  |
| KAN_L             | 1.1        | 3.2        | 0.90           | 26284                  |
| KAN_M             | 1.0        | 3.5        | 0.91           | 21184                  |
| KAN_U             | 0.9        | 3.3        | 0.93           | 24039                  |
| UPE_L             | 2.0        | 4.5        | 0.85           | 25747                  |
| UPE_U             | 1.0        | 3.3        | 0.92           | 26291                  |
| <b>Mean value</b> | <b>1.2</b> | <b>3.5</b> | <b>0.89</b>    |                        |

**Table S7. Model performance in terms of simulating hourly snow and ice albedo at each AWS on the GrIS (Figure 1). Note that the evaluation were conducted at only SIGMA and PROMICE sites.**

| Sites            | ME          | RMSE        | R <sup>2</sup> | Number of observations |
|------------------|-------------|-------------|----------------|------------------------|
| SIGMA-A          | 0.02        | 0.07        | 0.04           | 3150                   |
| SIGMA-B          | 0.07        | 0.15        | 0.06           | 3250                   |
| KPC_U            | 0.09        | 0.13        | 0.06           | 4451                   |
| SCO_U            | 0.22        | 0.27        | 0.09           | 5297                   |
| TAS_U            | 0.15        | 0.24        | 0.10           | 3627                   |
| QAS_L            | 0.32        | 0.41        | 0.12           | 6415                   |
| QAS_A            | 0.15        | 0.25        | 0.03           | 2252                   |
| NUK_L            | 0.27        | 0.32        | 0.13           | 4501                   |
| NUK_U            | 0.20        | 0.25        | 0.09           | 4752                   |
| NUK_N            | 0.23        | 0.33        | 0.12           | 5352                   |
| KAN_L            | 0.19        | 0.23        | 0.16           | 6003                   |
| KAN_M            | 0.17        | 0.25        | 0.12           | 4571                   |
| KAN_U            | 0.08        | 0.11        | 0.07           | 5967                   |
| UPE_L            | 0.11        | 0.17        | 0.19           | 5136                   |
| UPE_U            | 0.15        | 0.22        | 0.10           | 5243                   |
| <b>Men value</b> | <b>0.16</b> | <b>0.23</b> | <b>0.10</b>    |                        |

**Table S8. Model performance (on-line version of NHM-SMAP) in terms of simulating JJA hourly 2m air temperature at each AWS on the GrIS (Figure 1).**

| Sites      | ME (°C) | RMSE (°C) | R <sup>2</sup> | Number of observations | Elevation (m) |
|------------|---------|-----------|----------------|------------------------|---------------|
| SIGMA-A    | -0.1    | 1.5       | 0.83           | 5894                   | 1490          |
| SIGMA-B    | 1.1     | 1.7       | 0.87           | 5446                   | 944           |
| Summit     | -0.1    | 3.5       | 0.67           | 5772                   | 3208          |
| S-Dome     | 0.2     | 2.2       | 0.80           | 4521                   | 2901          |
| KPC_U      | -1.2    | 2.0       | 0.79           | 6624                   | 870           |
| SCO_U      | -1.7    | 2.6       | 0.57           | 6122                   | 980           |
| TAS_U      | 2.6     | 3.2       | 0.41           | 4414                   | 570           |
| QAS_L      | 1.4     | 2.3       | 0.45           | 4273                   | 290           |
| QAS_A      | -1.4    | 2.3       | 0.48           | 1992                   | 1010          |
| NUK_L      | 0.1     | 1.7       | 0.53           | 5351                   | 550           |
| NUK_U      | -0.7    | 2.0       | 0.67           | 5308                   | 1130          |
| NUK_N      | -0.3    | 1.5       | 0.74           | 3227                   | 920           |
| KAN_L      | 0.1     | 1.2       | 0.76           | 5960                   | 680           |
| KAN_M      | -0.8    | 1.9       | 0.80           | 5097                   | 1270          |
| KAN_U      | -1.5    | 2.5       | 0.81           | 6618                   | 1840          |
| UPE_L      | -0.1    | 1.7       | 0.62           | 6360                   | 220           |
| UPE_U      | -0.6    | 1.4       | 0.87           | 5044                   | 940           |
| Mean value | -0.2    | 2.1       | 0.69           |                        |               |



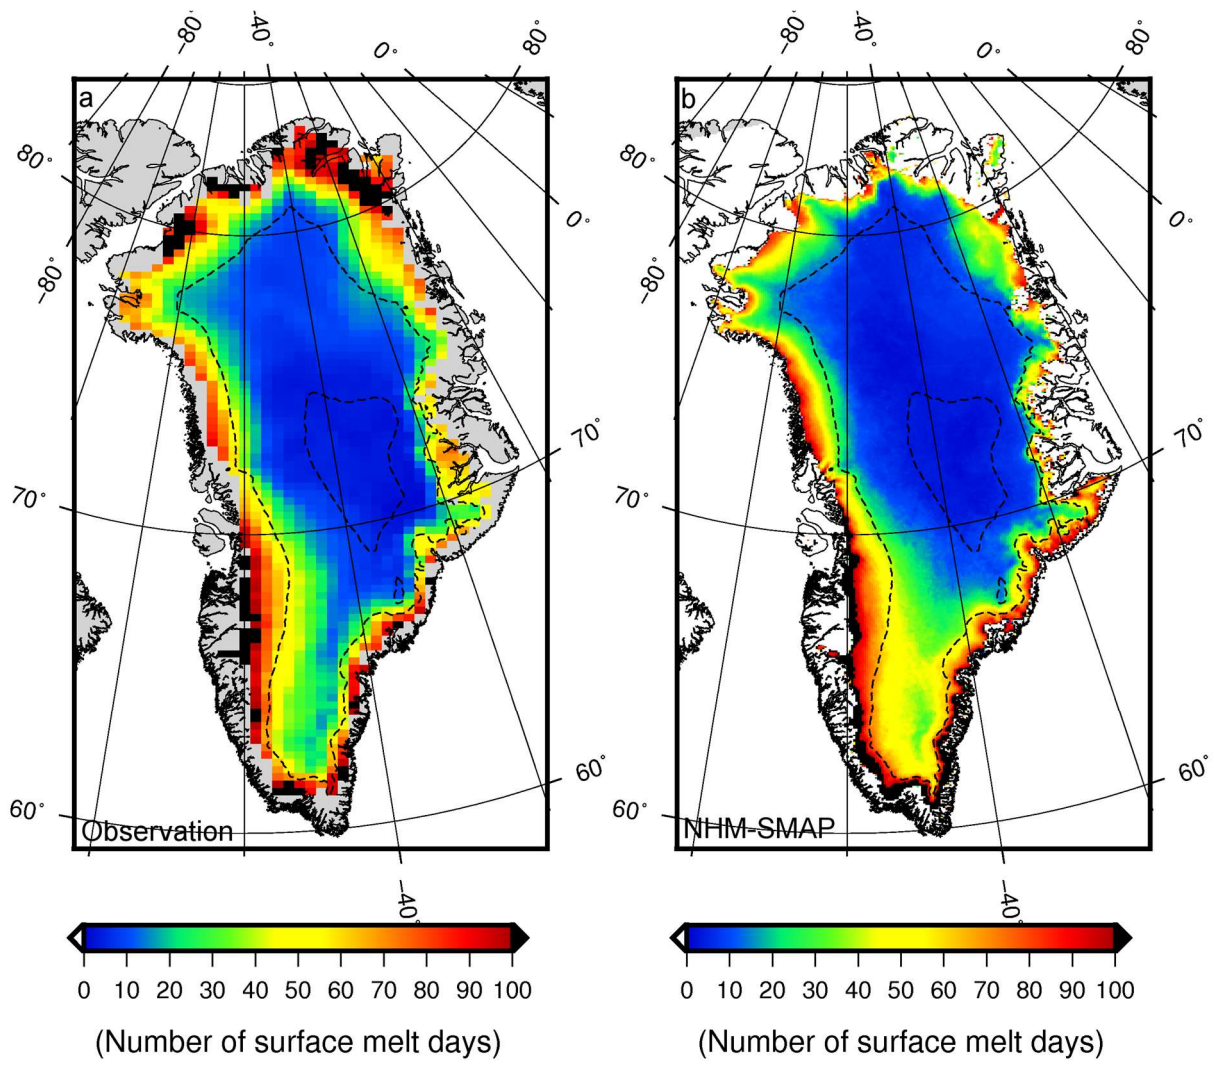

**Figure S1: (a) Observed and (b) simulated number of the GrIS surface melt days in 2012. Observation data are from Mote (2014).**

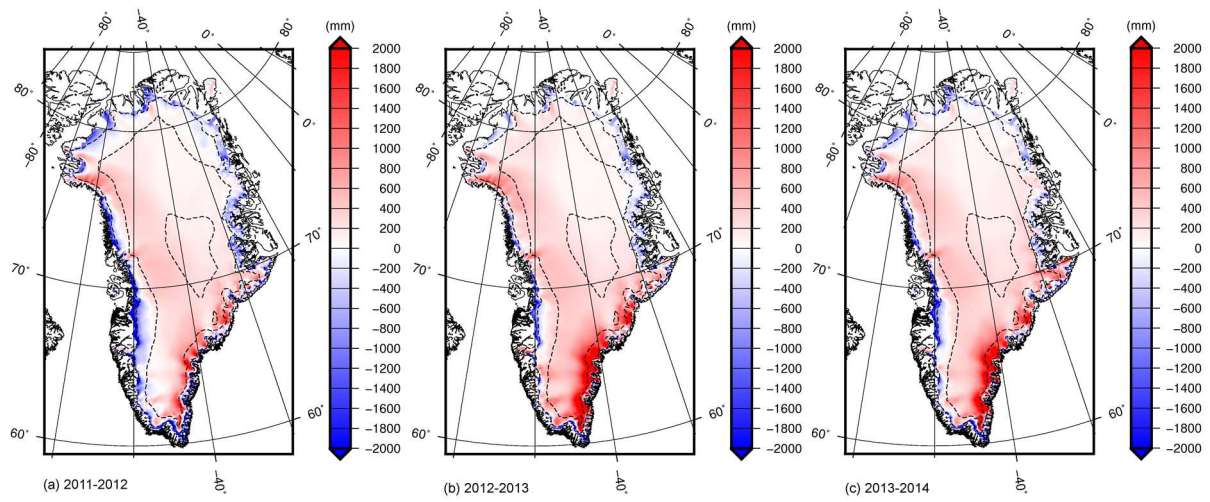

**Figure S2: The NHM-SMAP simulated accumulated GrIS SMB (in mm) during the (a) 2011-2012, (b) 2012-2013, and (c) 2013-2014 mass balance years (September to August).**

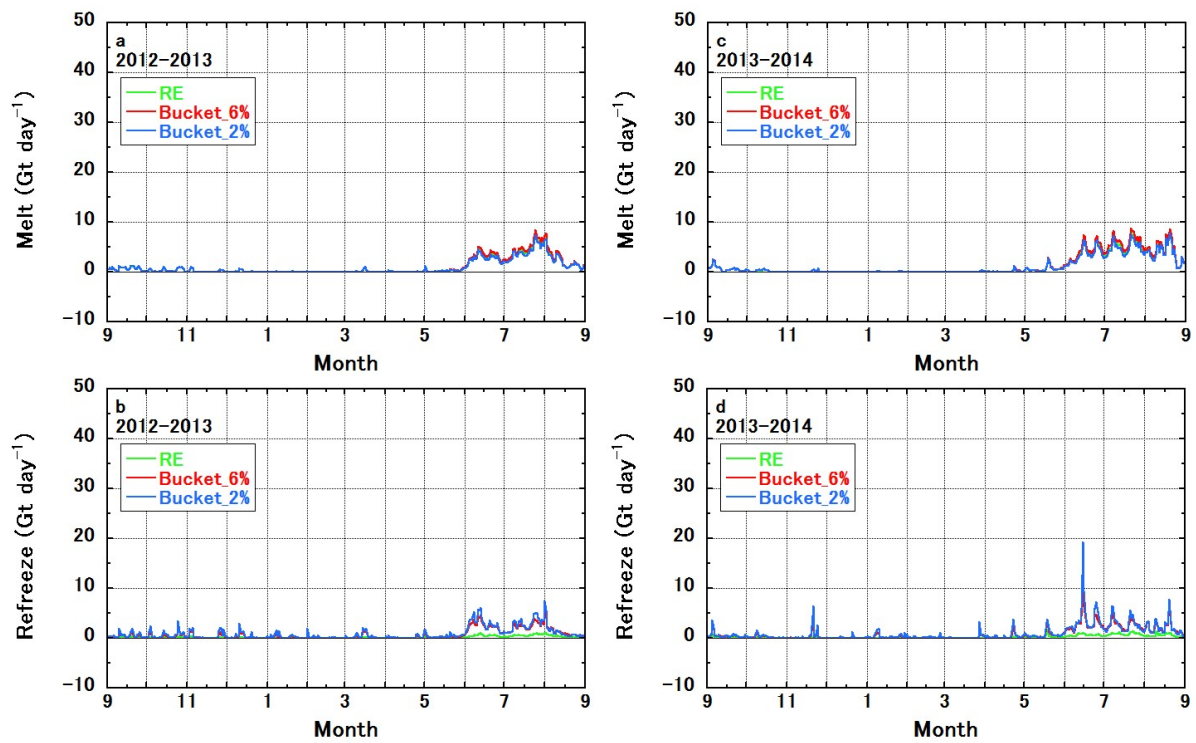

**Figure S3: Sensitivity to the choice of vertical water movement scheme of the simulated top 30m integrated (a and c) melt and (b and d) refreeze for the GrIS during the (a and b) 2012-2013 and (c and d) 2013-2014 mass balance years. RE indicates the default setting for vertical water movement in snow and firn based on the Richards equation; Bucket\_6% and Bucket\_2% are alternative settings based on simple bucket schemes with irreducible water contents of 6 % and 2 % of the pore volume.**
